# Supplementary material
Source: PubMed Central journal article supplement (PMC5877315)
Supplement: NIHMS947585-supplement.pdf [file NIHMS947585-supplement.pdf]

# SUPPLEMENT

## TABLES

| <b><u>14(15)-EET</u></b>                     |           |            |                          |                           | <b><u>8(9)-EET</u></b> |           |            |                          |                           |
|----------------------------------------------|-----------|------------|--------------------------|---------------------------|------------------------|-----------|------------|--------------------------|---------------------------|
|                                              | <i>SD</i> | <i>JCR</i> | <i>JCR +<br/>20-SOLA</i> | <i>JCR +<br/>20-HEDGE</i> |                        | <i>SD</i> | <i>JCR</i> | <i>JCR +<br/>20-SOLA</i> | <i>JCR +<br/>20-HEDGE</i> |
| <b>Aorta</b>                                 | 101±6     | 42±3 *     | 35±7 *                   | 43±7 *                    |                        | 74±7      | 75±13      | 75±8                     | 83±11                     |
| <b>Carotid artery</b>                        | 98±7      | 42±12 *    | 44±5 *                   | 42±8 *                    |                        | 72±9      | 82±8       | 76±7                     | 74±3                      |
| <b>Small mesenteric arteries<br/>(~50µM)</b> | 345±13    | 154±12 *   | 148±11 *                 | 150±8 *                   |                        | 109±3     | 110±14     | 110±6                    | 104±3                     |
| <b>Coronary arteries</b>                     | 302±4     | 138±3 *    | 135±8 *                  | 141±6 *                   |                        | 102±4     | 102±6      | 95±8                     | 101±6                     |

\* p<0.05 vs. SD

| <b><u>11(12)-EET</u></b>                     |           |            |                          |                           | <b><u>5(6)-EET</u></b> |           |            |                          |                           |
|----------------------------------------------|-----------|------------|--------------------------|---------------------------|------------------------|-----------|------------|--------------------------|---------------------------|
|                                              | <i>SD</i> | <i>JCR</i> | <i>JCR +<br/>20-SOLA</i> | <i>JCR +<br/>20-HEDGE</i> |                        | <i>SD</i> | <i>JCR</i> | <i>JCR +<br/>20-SOLA</i> | <i>JCR +<br/>20-HEDGE</i> |
| <b>Aorta</b>                                 | 238±7     | 92±11 *    | 85±4 *                   | 88±11 *                   |                        | 149±7     | 152±14     | 151±11                   | 149±14                    |
| <b>Carotid artery</b>                        | 248±11    | 89±8 *     | 92±8 *                   | 91±11 *                   |                        | 148±11    | 152±2      | 145±7                    | 15±5                      |
| <b>Small mesenteric arteries<br/>(~50µM)</b> | 659±13    | 121±8 *    | 132±14 *                 | 129±11 *                  |                        | 236±8     | 213±11     | 219±13                   | 212±8                     |
| <b>Coronary arteries</b>                     | 630±14    | 108±7 *    | 105±8 *                  | 101±16 *                  |                        | 240±11    | 228±7      | 225±15                   | 231±12                    |

\* p<0.05 vs. SD

**Table 1.** Mass spectrometry (LC/MS/MS) measurements of epoxyeicosatrienoic acids (EETs (pg/mg) in aorta and carotid arteries of SD, JCR and JCR+20-HEDGE-treated rats as indicated.

|                       | <i>SD</i> | <i>JCR</i>  | <i>JCR +<br/>20-SOLA</i> | <i>JCR +<br/>20-HEDGE</i> |
|-----------------------|-----------|-------------|--------------------------|---------------------------|
| <b>MABP (mmHg)</b>    | 94±7      | 152±4 *     | 135±5 *                  | 133±4 *                   |
| <b>HR (beats/min)</b> | 338±11    | 332±8       | 335±5                    | 333±4                     |
| <b>LVWT,d (mm)</b>    | 1.66±0.02 | 2.62±0.02 * | 2.60±0.03 *              | 2.62±0.03 *               |
| <b>IVSWT,d (mm)</b>   | 1.59±0.03 | 2.13±0.02 * | 2.11±0.01 *              | 2.12±0.02 *               |
| <b>LVEDD (mm)</b>     | 7.7±0.02  | 5.3±0.02 *  | 5.3±0.02 *               | 5.3±0.02 *                |
| <b>LVESD (mm)</b>     | 3.1±0.03  | 2.6±0.01 *  | 2.6±0.01 *               | 2.6±0.01 *                |
| <b>LVEDV (μl)</b>     | 324±6     | 216±4 *     | 216±3 *                  | 216±3 *                   |
| <b>LVESV (μl)</b>     | 40±4      | 32±2 *      | 32±3 *                   | 32±2 *                    |
| <b>CO (μl/min)</b>    | 95±8      | 61±7 *      | 62±2 *                   | 61±3 *                    |
| <b>EF (%)</b>         | 88±5      | 85±4        | 85±3                     | 85±2                      |

\* p<0.05 vs. SD

**Table 2.** Echocardiographic measurements of cardiac function in anesthetized SD, JCR and JCR+20-SOLA- and JCR+20-HEDGE-treated rats as indicated. MABP, mean arterial blood pressure; HR, heart rate, LVWT,d, left ventricular wall thickness in diastole, IVSWT,d, intraventricular septum wall thickness in diastole, LVEDD and LVESD, left ventricular diastolic and systolic diameter; LVEDV and LVESV, left ventricular end diastolic and systolic volume; CO, cardiac output; EF, ejection fraction.

## FIGURES

**A.**

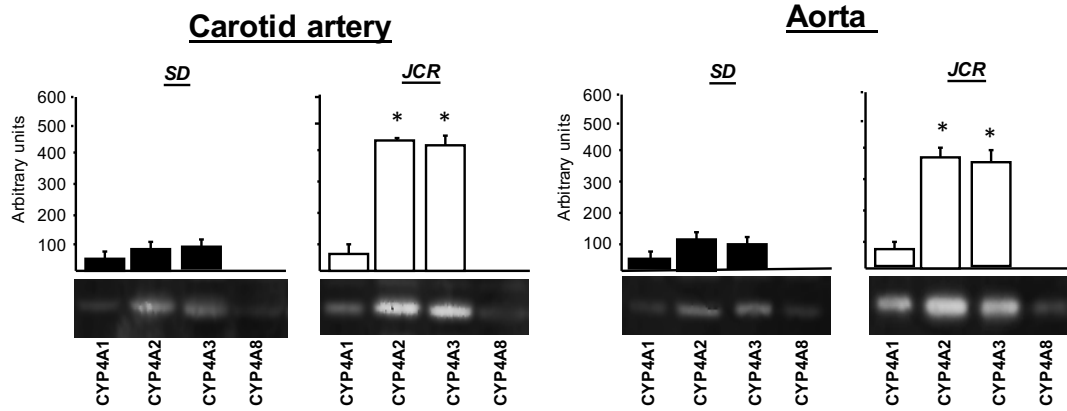

**B.**

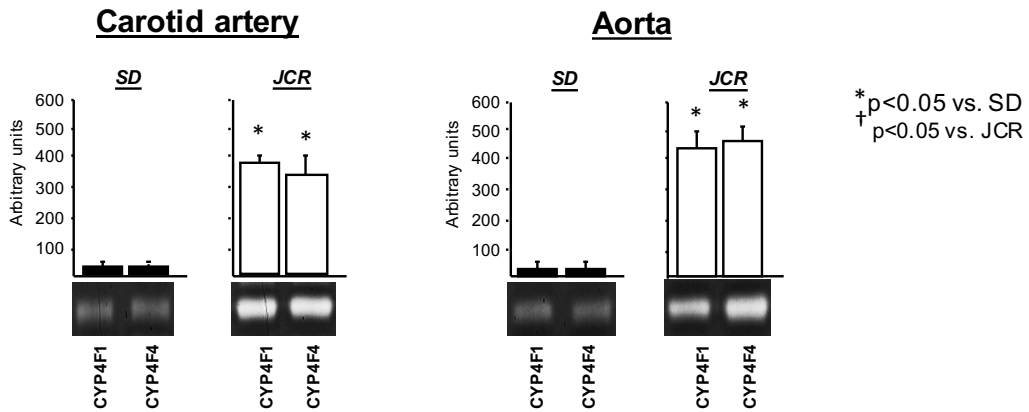

**Figure I.** SD and JCR rats were sacrificed and arterial tissue collected. CYP4A (A) and CYP4F (B) isoform expression was analyzed by RT-PCR.

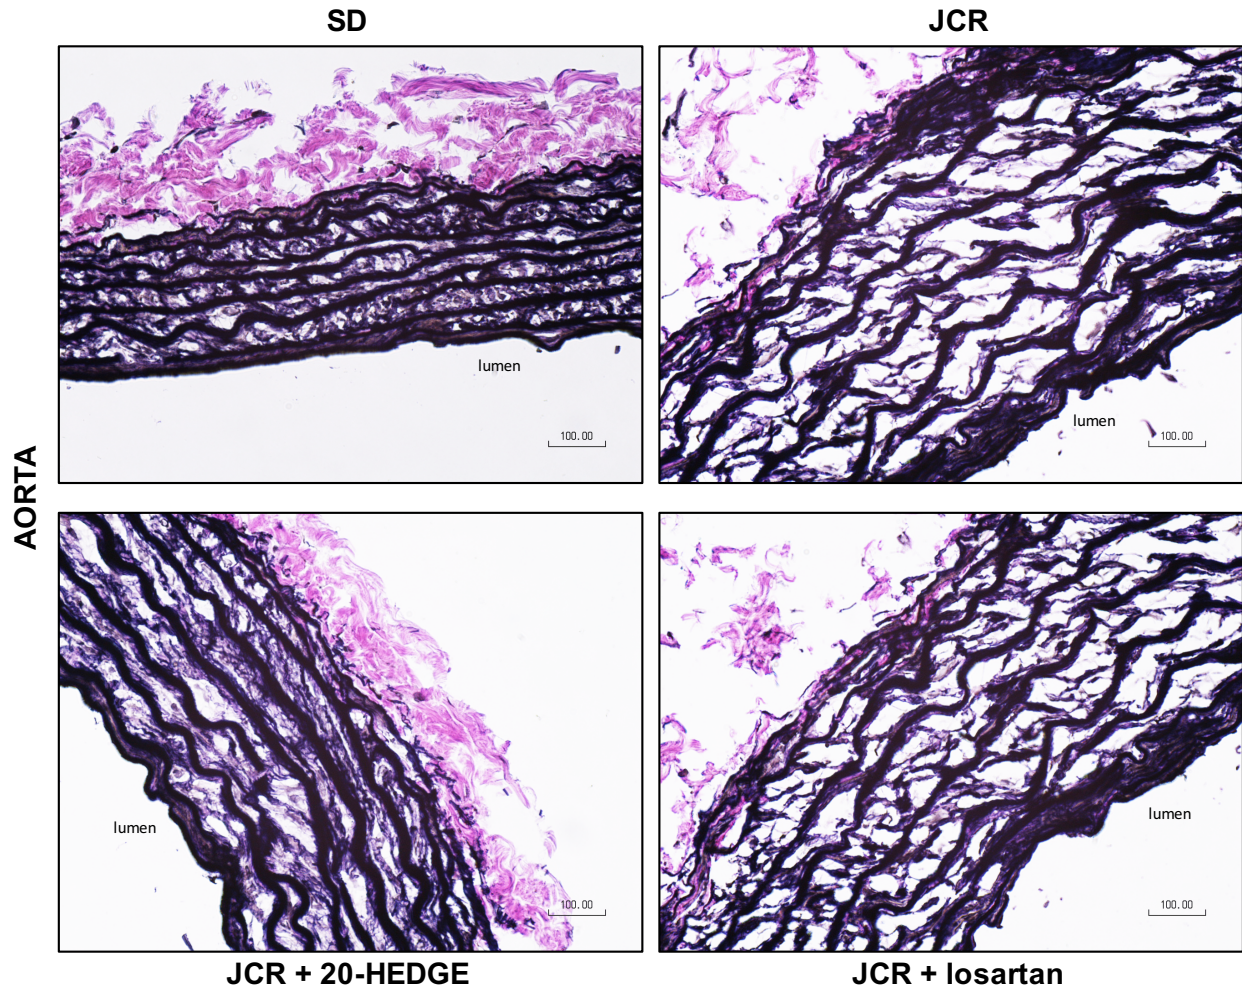

**Figure II.** SD and JCR rats were treated with 20-HEDGE or losartan for 14 days where indicated, sacrificed and arterial tissue collected. **A.** Representative Verhoeff–Van Gieson (VVG, black) staining of aorta tissue sections at 100X magnification is shown.

A.

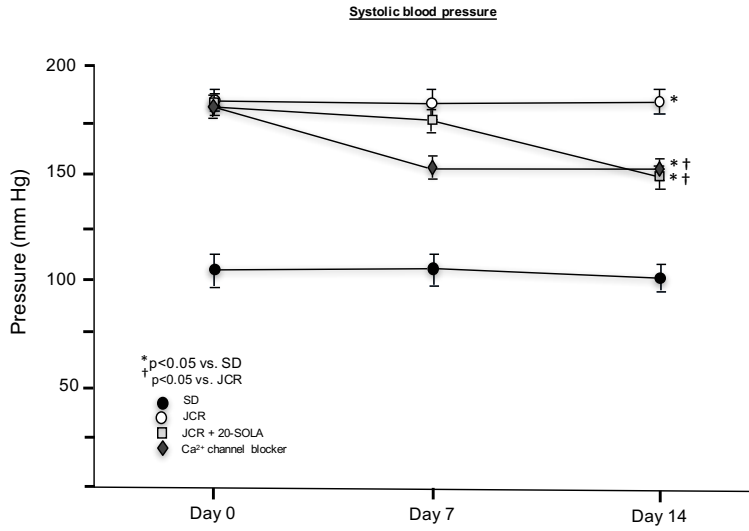

B.

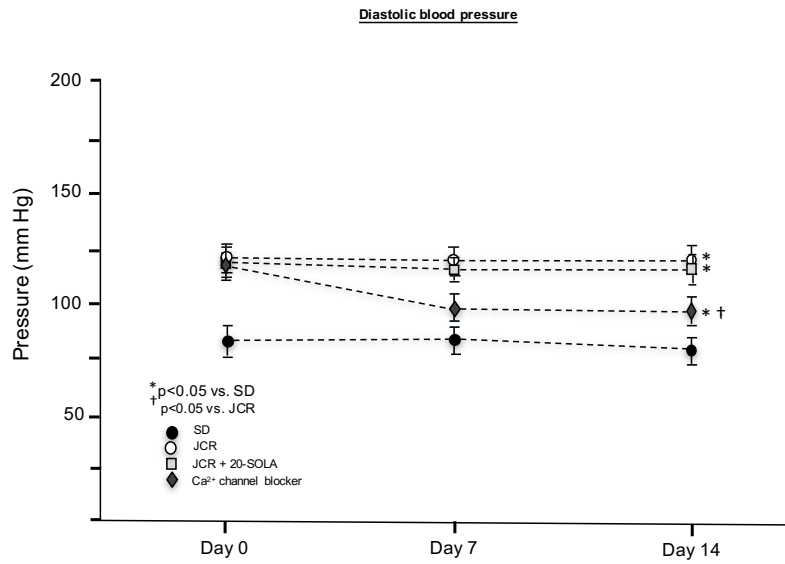

C.

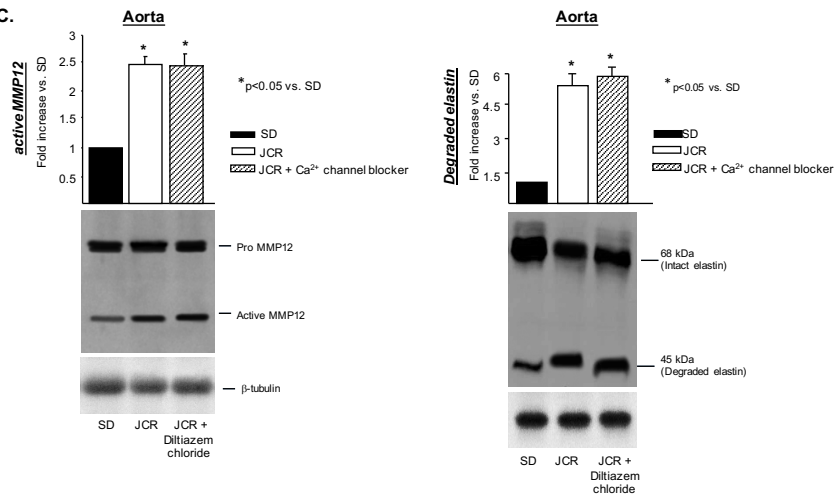

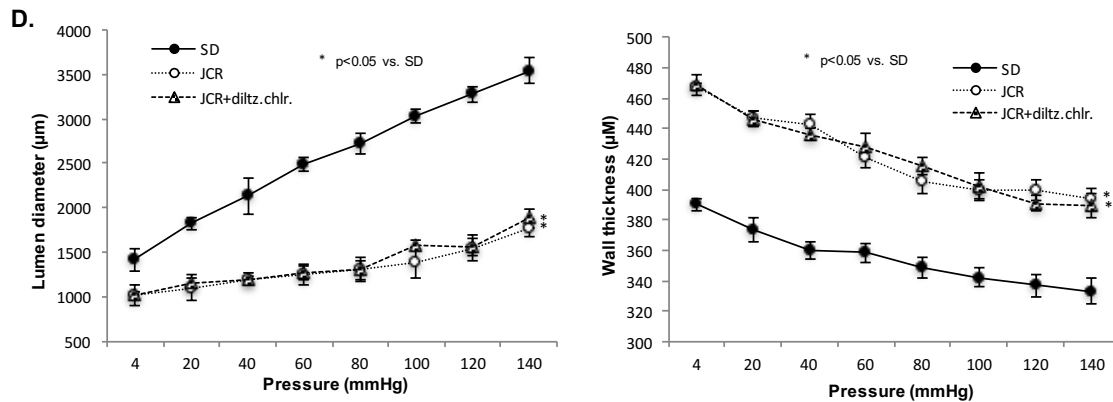

**Figure III.** JCR rats were treated with 20-SOLA or diltiazem chloride for 14 days where indicated. Systolic (**A**) and diastolic (**B**) blood pressure was measured in SD and JCR rats using an aortic catheter connected to a pressure transducer (Millar) on day 0, 7 and 14 of treatment. **C.** Representative Western blots (bottom) and cumulative data (top) showing pro and active (cumulative data) MMP12 expression (**left**) and total and degraded elastin (cumulative data) (**right**) in aorta tissue homogenates are shown. **D.** Lumen diameter and wall thickness of aorta were measured on a pressure myograph.  $n=8$ , \*, †  $p<0.05$  as indicated.

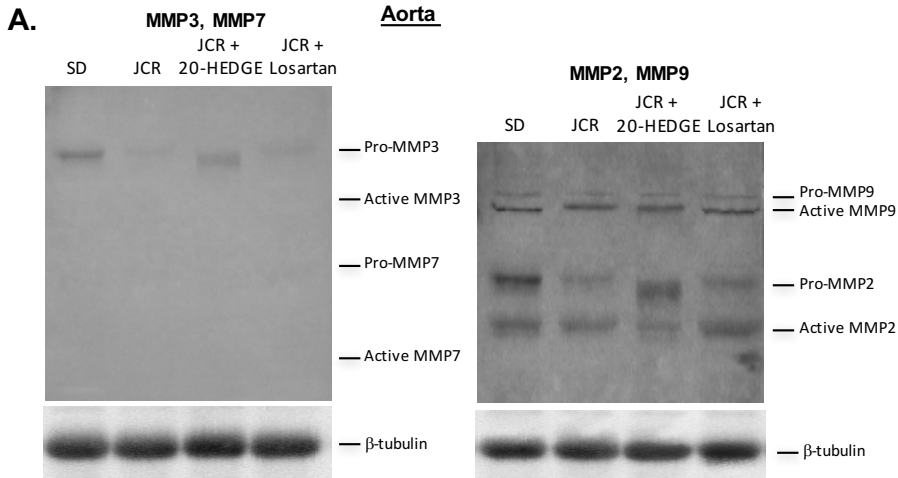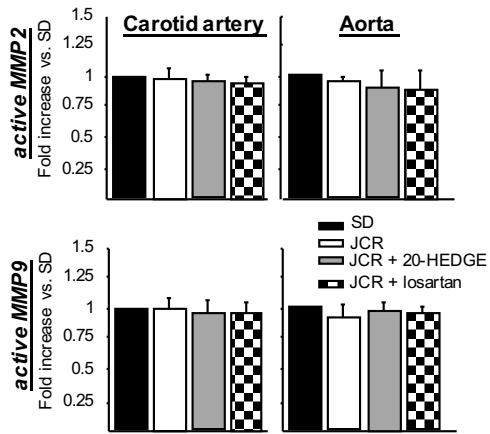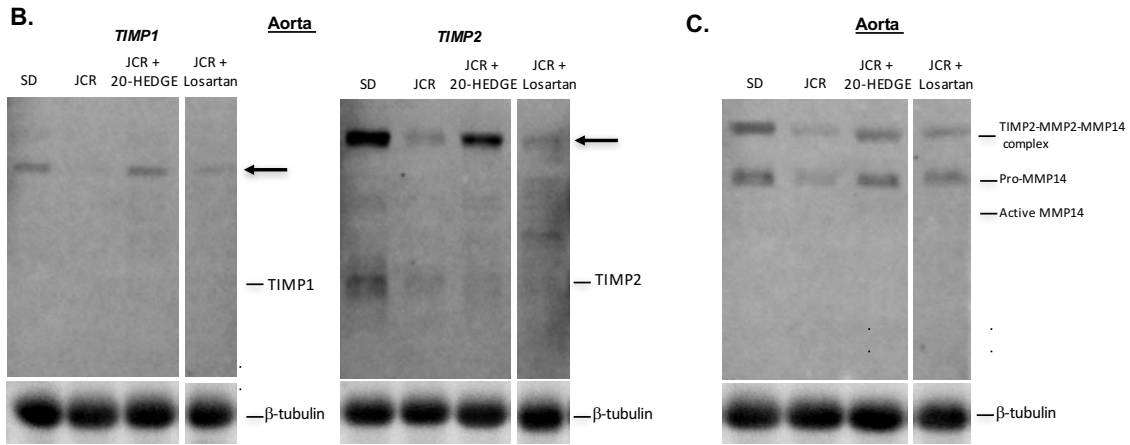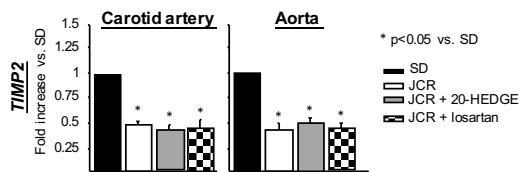

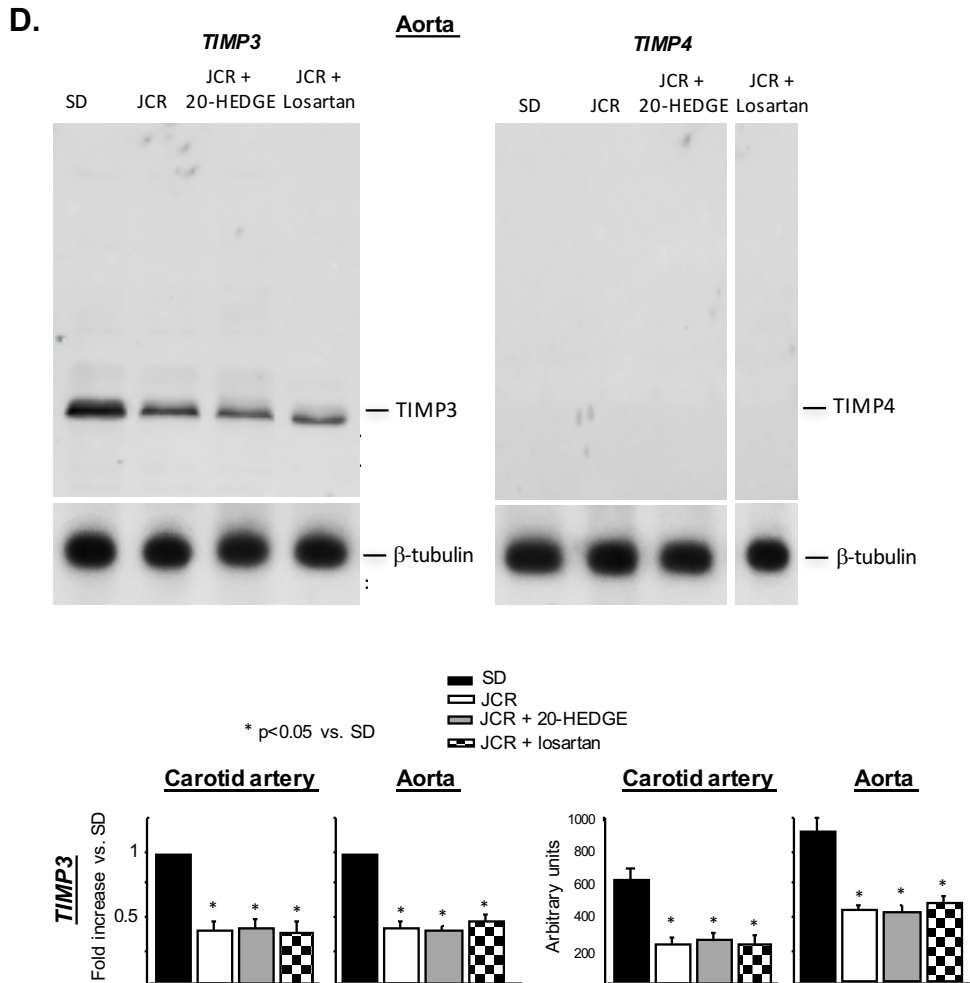

**Figure IV.** SD and JCR rats were treated with 20-HEDGE or losartan for 14 days where indicated, sacrificed and aortic tissue collected. Representative Western blots (top) and cumulative data (bottom) showing pro and active (cumulative data) MMP3, MMP7, MMP2 and MMP9 expression (A), TIMP1 and TIMP2 expression (B), pro and active MMP14 expression (C), and TIMP3 and TIMP4 expression (D) in aorta tissue homogenates are shown. n=8, \*, † p<0.05 as indicated. *Note:* Where cumulative data for active MMPs or TIMPs are missing, no protein expression was detected even with high amount of protein (100  $\mu$ g) at long (5-10 min) exposures.



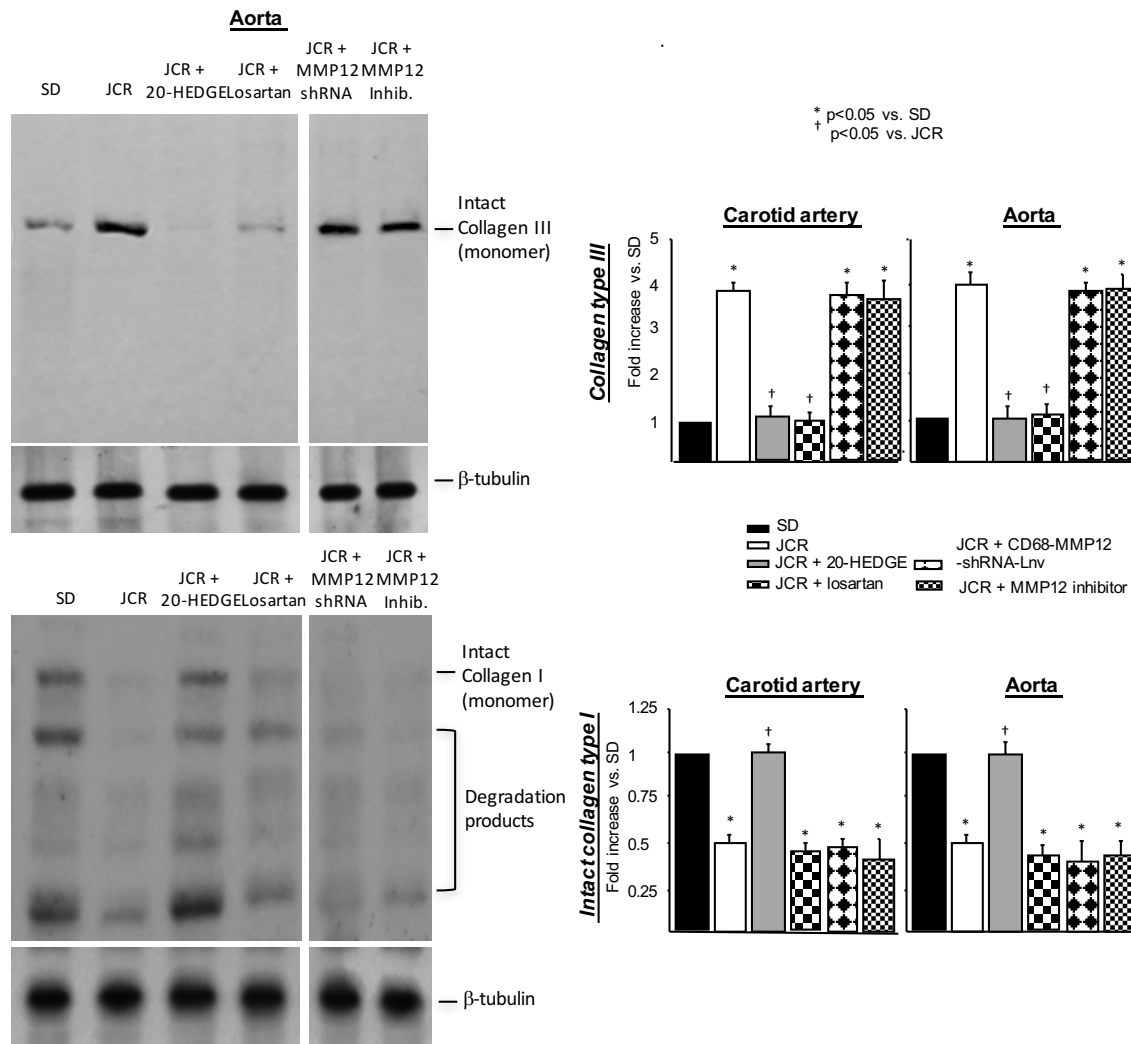

**Figure V.** SD and JCR rats were treated with 20-HEDGE, losartan, the MMP12-shRNA-Lnv or the pharmacological MMP12 inhibitor for 14 days where indicated, sacrificed and aortic tissue collected. **A.** Representative Western blots (left) and cumulative data (right, intact collagen) showing type III (top) and type I (bottom) collagen expression are shown. n=8, \*, † p<0.05 as indicated.

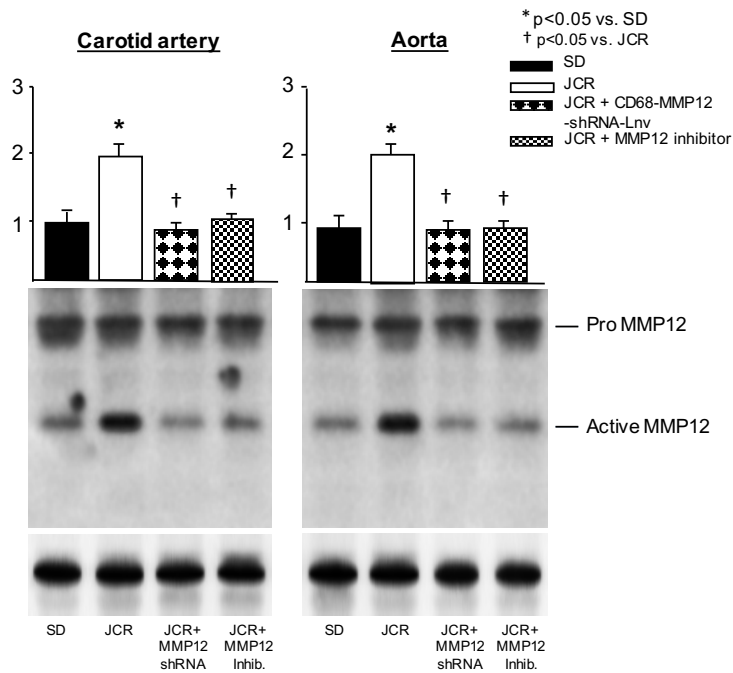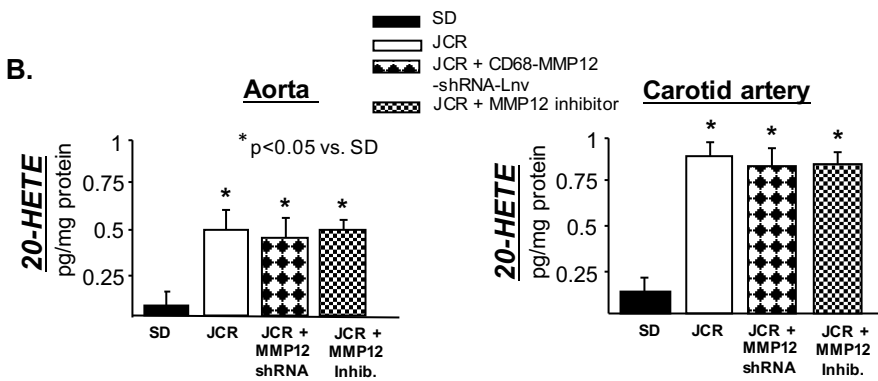

**FIGURE VI.** SD and JCR rats were treated with the MMP12-shRNA-Lnv or the pharmacological MMP12 inhibitor for 14 days where indicated, sacrificed and arterial tissue collected. **A.** Representative Western blots (bottom) and cumulative data (top) showing pro and active (cumulative data) MMP12 expression in carotid artery and aorta tissue homogenates are shown. **B.** LC-MS quantitation of 20-HETE production represented in pg/mg protein. n=8, \*, † p<0.05 as indicated.

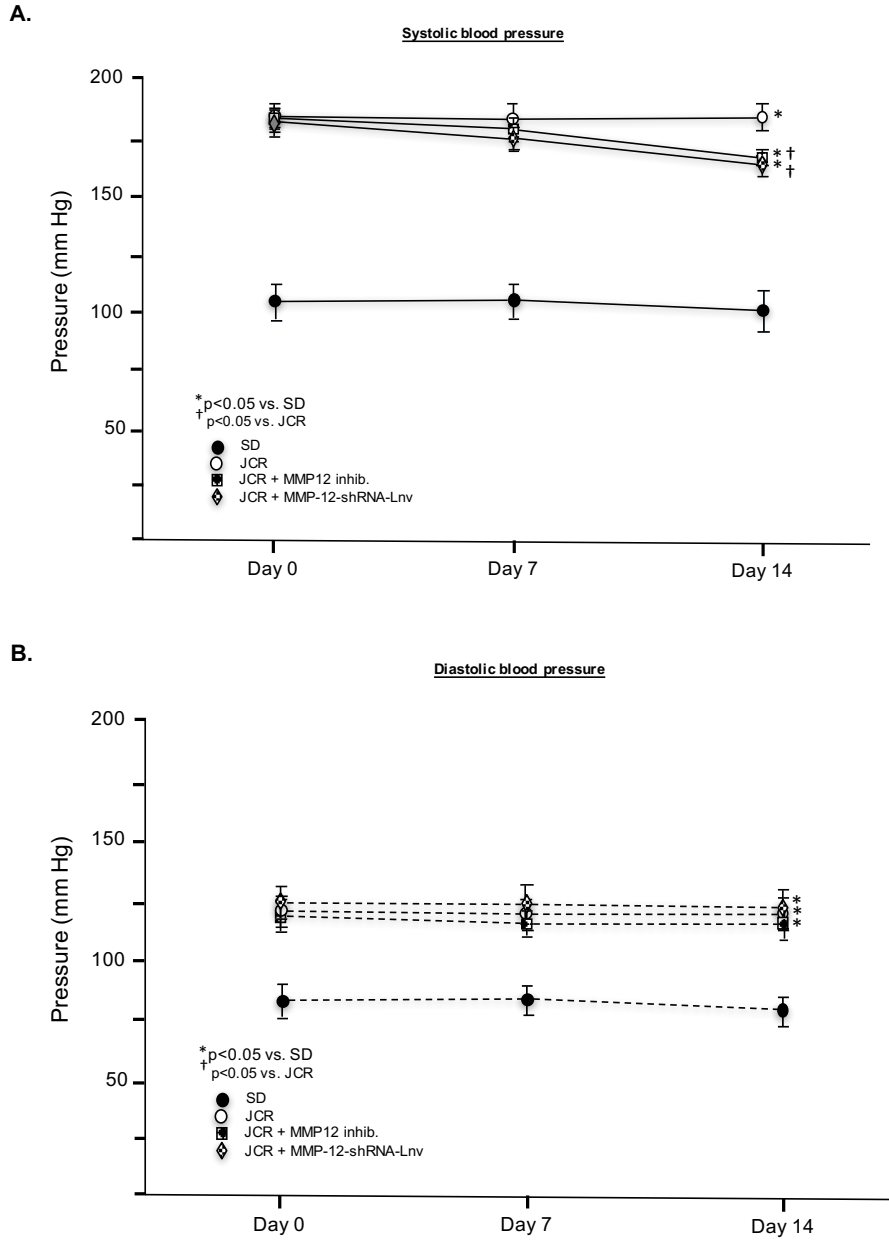

**FIGURE VII.** JCR rats were treated with the MMP12-shRNA-Lnv or the pharmacological MMP12 inhibitor for 14 days where indicated. Systolic (**A**) and diastolic (**B**) blood pressure was measured in SD and JCR rats using an aortic catheter connected to a pressure transducer (Millar) on day 0, 7 and 14 of treatment. n=8, \*, † p<0.05 as indicated.

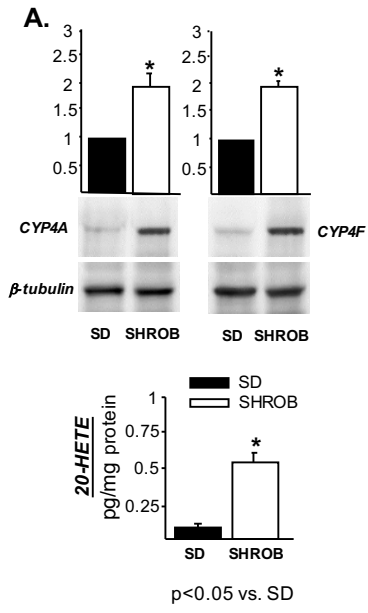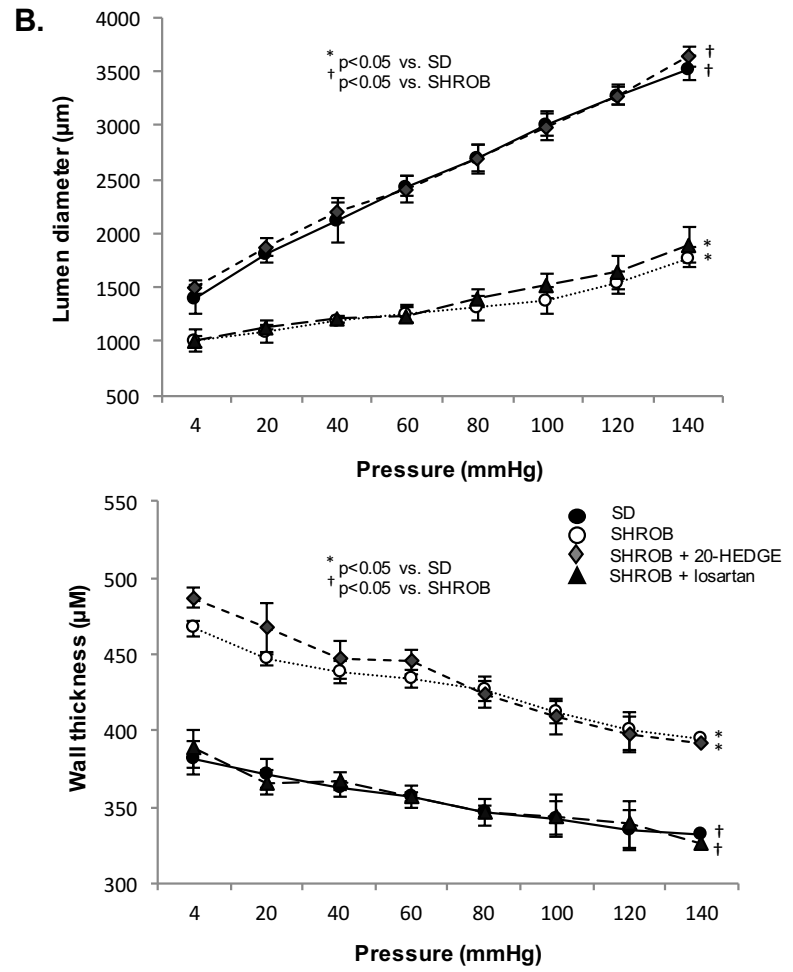

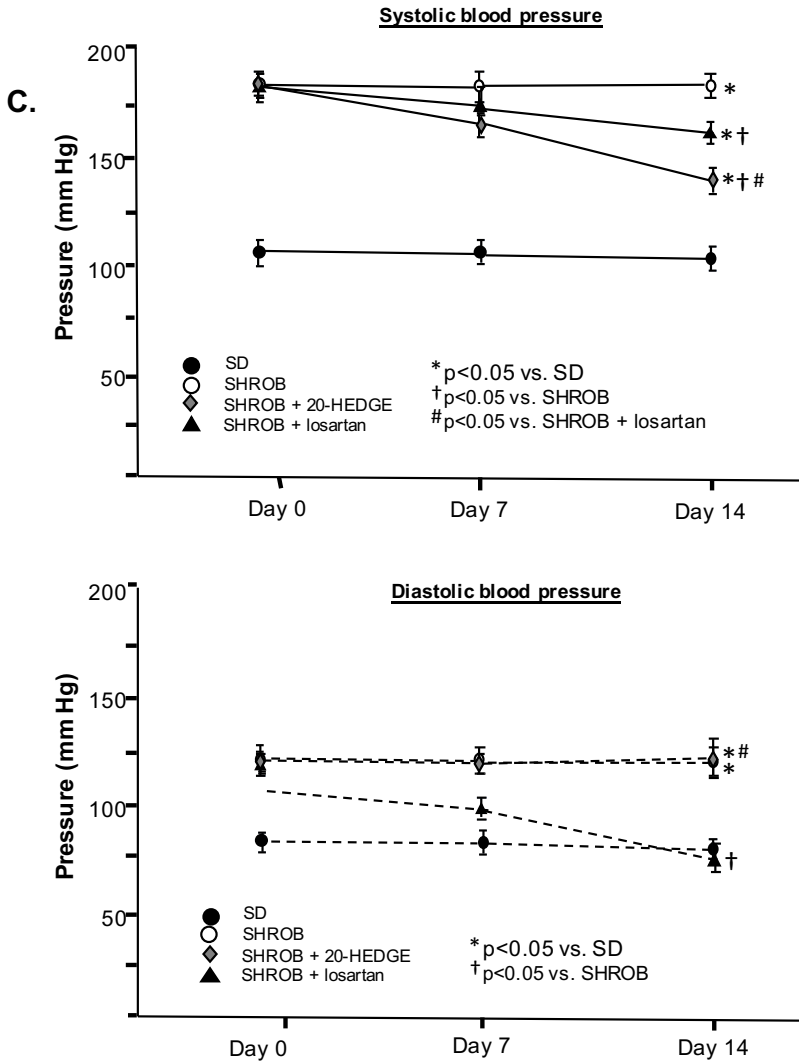

**FIGURE VIII.** SD and SHROB rats were treated with 20-HEDGE or losartan for 14 days where indicated, sacrificed and aortic tissue collected. **A.** Representative Western blots and cumulative data (top) showing CYP4A and CYP4F expression and LC-MS quantitation of 20-HETE production represented in pg/mg protein (bottom) in aorta tissue homogenates. n=8, \* p<0.05 as indicated. **B.** Lumen diameter and wall thickness of aorta were measured on a pressure myograph. n=8, \*, † p<0.05 as indicated. **C.** Systolic (top) and diastolic (bottom) blood pressure was measured in SD and SHROB rats using an aortic catheter connected to a pressure transducer (Millar) on day 0, 7 and 14 of treatment. n=8, \*, †, # p<0.05 as indicated.
